# Supplementary material
Source: PubMed Central journal article supplement (PMC3100921)
Supplement: 1101747108_pnas.201101747SI.pdf [file 1101747108_pnas.201101747SI.pdf]

# Supporting Information

Cheung et al. 10.1073/pnas.1101747108

## SI Materials and Methods

**Cell Culture.** Three MCHs (14F, 14T, and 14U), seven NPC cell lines (HONE1, HK1, HNE1, CNE1, CNE2, C666-1, and SUNE1), a tetracycline transactivator tTA-producing cell line (HONE1-2), and the immortalized nasopharyngeal epithelial cell line NP460 were cultured as described previously (1–3). HUVECs (Lonza) were cultured as described previously (4).

**NPC Tissue Specimens.** Paired normal nasopharyngeal and NPC biopsy specimens from 60 NPC patients were collected from Queen Mary Hospital between 2006 and 2008, as described previously (5, 6). This study was approved by the University of Hong Kong's from the Institutional Review Board. Fiberoptic nasopharyngoscopy was used to obtain the paired normal and tumor biopsy materials. Tumor tissues were obtained directly from the site of tumor growth. If tumors localized to one side, the normal tissue samples were taken from the contralateral side having a normal mucosal appearance and no evidence for contact bleeding. For patients having bilateral tumor involvement, normal tissues were taken from the nasal cavity.

**Real-Time qPCR Analysis.** qPCR was performed as described previously (7) in an Applied Biosystems Step-One Plus analyzer using TaqMan PCR core reagent kits, *CRIP2*- and *GAPDH*-specific primers and probes, and SYBR-green PCR core reagent kits (Applied Biosystems). The universal probe library (Roche Diagnostics), was used to confirm the expression of *BclXL* and *survivin* expression according to manufacturer's instructions. Primer sequences for the angiogenesis and apoptosis-related proteins are listed in Table S2. The IL-6 qPCR primer was designed as described previously (8).

**Western Blot and IHC Staining Analyses.** Western blot analysis was performed as described previously (9). Primary antibodies for *CRIP2* (1:1,000; ab83489; Abcam), I $\kappa$ B $\alpha$  and phosphorylated p65 (1:1,000; 2859 and 3033, respectively; Cell Signaling Technology), histone (1:2,500; sc-8030; Santa Cruz Biotechnology), and  $\alpha$ -tubulin (1:10,000; Calbiochem) were used. IHC staining analysis was performed using a CD34 antibody (1:40; sc-18917; Santa Cruz Biotechnology), as described previously (10).

**In Vivo Tumorigenicity Assay.** The in vivo tumorigenicity assay was performed as described previously (3). In brief, a total of  $1 \times 10^7$  of cells were injected s.c. into both flanks of three athymic BALB/c Nu/Nu 6–8-wk old nude mice (six sides). Tumor sizes were measured weekly. The in vivo inhibition of tetracycline-induced gene expression was performed by addition of doxycycline to the drinking water, as described previously (2).

**HUVEC Tube Formation Assay.** The HUVEC tube formation assay was performed as described previously (4). In brief, 50  $\mu$ L of growth factor-reduced matrigel (BD Biosciences) was coated on each well of a 96-well culture plate. The conditioned medium ( $\pm$ dox) was collected by incubating the vector-alone and *CRIP2*-

expressing clones with DMEM without serum for at least 24 h. HUVEC cells were mixed with 100  $\mu$ L of conditioned media from different cell lines and 1% FBS. The mixture was then seeded into the well coated with matrigel. The cells were then incubated for four to five hours for tube-like structure formation. The images were captured using an inverted microscope (400 $\times$  magnification) (Nikon Instruments). The total tube length from three different fields was measured using SPOT software (Diagnostic Instrument).

**In Vivo Matrigel Plug Angiogenesis Assay.** A total of  $10^7$  cells mixed with 50  $\mu$ L of DMEM and 250  $\mu$ L of Matrigel (BD Biosciences) were injected s.c. into one site for each of five nude mice. The gel plugs were excised after 7 d postinjection. The gel plugs were then fixed with formalin and paraffin embedded. Histological sections were stained with anti-CD34 antibody as described in the previous section. The CD34-positive staining of vascular endothelial cells was analyzed by ImageScope v10 software (Aperio).

**Human Angiogenesis Antibody Array Analysis.** Conditioned media of the vector-alone and *CRIP2*-stable clones were used for angiogenesis antibody array analysis. The conditioned media were hybridized with a human angiogenesis antibody array (RayBiotech), as described in the manufacturer's manual.

**VEGF ELISA Analysis.** VEGF protein levels in the vector-alone and *CRIP2*-stable clones were detected using the Quantikine Human VEGF immunoassay system (R&D Systems) (4). Absorbance was detected using the Labsystems Multiskan MS Plate Reader (Thermo Fisher Scientific).

**Subcellular Fractionation.** Subcellular fractionation was performed as described previously (11). In brief, cells were seeded onto a 150-mm culture plate. Cells were then scraped from the plate, and subcellular fractionation was performed to obtain the nuclear, cytoplasmic, and membrane fractions. The  $\alpha$ -tubulin and histone were used as positive controls of the cytoplasmic and the membrane and nuclear fractions, respectively.

**Coimmunoprecipitation (Co-IP).** Cells were seeded on a 150-mm culture plate for each co-IP reaction. The nondenaturing lysis buffer [20 mM Tris HCl (pH 8), 137 mM NaCl, 10% glycerol, 1% Nonidet P-40, and 2 mM EDTA] was used for cell lysis. The cell lysate was then immunoprecipitated with *CRIP2* and IgG antibodies.

**Statistical Analysis.** The results of in vitro assay represent the arithmetic mean  $\pm$  SE of triplicate determinations of at least two independent experiments. Student *t*-test was used to determine the confidence levels in group comparisons. The  $\chi^2$  and Fisher's exact tests were used to analyze significant differences of *CRIP2* gene expression observed by qPCR. A *P* value  $< 0.05$  was considered statistically significant.

1. Li HM, et al. (2006) Molecular and cytogenetic changes involved in the immortalization of nasopharyngeal epithelial cells by telomerase. *Int J Cancer* 119: 1567–1576.
2. Protopopov AI, et al. (2002) Human cell lines engineered for tetracycline-regulated expression of tumor-suppressor candidate genes from a frequently affected chromosomal region, 3p21. *J Gene Med* 4:397–406.
3. Cheng Y, et al. (1998) Functional evidence for a nasopharyngeal carcinoma tumor suppressor gene that maps at chromosome 3p21.3. *Proc Natl Acad Sci USA* 95: 3042–3047.

4. Lo PH, et al. (2010) Extracellular protease ADAMTS9 suppresses esophageal and nasopharyngeal carcinoma tumor formation by inhibiting angiogenesis. *Cancer Res* 70:5567–5576.
5. Lung HL, et al. (2008) Characterization of a novel epigenetically silenced, growth-suppressive gene, ADAMTS9, and its association with lymph node metastases in nasopharyngeal carcinoma. *Int J Cancer* 123:401–408.
6. Cheung AK, et al. (2009) Chromosome 14 transfer and functional studies identify a candidate tumor-suppressor gene, mirror image polydactyly 1, in nasopharyngeal carcinoma. *Proc Natl Acad Sci USA* 106:14478–14483.



**Table S1. Tumorigenicity assays of vector-alone (BSD-C5) and CRIP2-expressing clones CRIP2-C9, -C10, and -C12 in nude mice**

| Transfectant cell lines | Identification           | dox | Tumor formation, no. of tumors/no. of sites | Days to appearance of tumors | P value* |                     |
|-------------------------|--------------------------|-----|---------------------------------------------|------------------------------|----------|---------------------|
| BSD-C5                  | HONE1-2 × pETE-Bsd       | +   | 6/6                                         | 21–28                        | —        |                     |
|                         |                          | –   | 6/6                                         | 21–28                        | 0.29     |                     |
| CRIP2-C9                | HONE1-2 × pETE-Bsd-CRIP2 | +   | 6/6                                         | 14–21                        | 0.221    |                     |
|                         |                          | –   | 4/6                                         | 35–42                        | 0.002    | 0.009 <sup>†</sup>  |
| CRIP2-C10               | HONE1-2 × pETE-Bsd-CRIP2 | +   | 6/6                                         | 14–21                        | 0.05     |                     |
|                         |                          | –   | 0/6                                         | 35–42                        | 0.001    | 0.0004 <sup>†</sup> |
| CRIP2-C12               | HONE1-2 × pETE-Bsd-CRIP2 | +   | 6/6                                         | 21–28                        | 0.473    |                     |
|                         |                          | –   | 4/6                                         | >42                          | 0.000    | 0.009 <sup>†</sup>  |

\*P value obtained by comparison with BSD-C5 (+dox) at 6 wk after injection.

<sup>†</sup>P value obtained by comparison of tumor sizes after treatment with or without dox.

**Table S2. qPCR primer sequences of angiogenesis-related genes**

| Gene              | Product size | Annealing temperature, °C | Primer sequence |                          |
|-------------------|--------------|---------------------------|-----------------|--------------------------|
| <i>GAPDH</i>      | 220          | 60                        | Forward:        | GAAGGTGAAGGTGGAGTC       |
|                   |              |                           | Reverse:        | GAAGATGGTGATGGGATTTTC    |
| <i>IL6</i>        | 238          | 60                        | Forward:        | GATGAGTACAAAAGTCCTGATCCA |
|                   |              |                           | Reverse:        | CTGCAGCCACTGGTTCTGT      |
| <i>IL8</i>        | 242          | 60                        | Forward:        | GGCCGTGGCTCTTTGGCAG      |
|                   |              |                           | Reverse:        | GCACCCAGTTTTCTTGGGGTCC   |
| <i>VEGF165</i>    | 74           | 60                        | Forward:        | TGTGAATGCAGACCAAAGAAAGA  |
|                   |              |                           | Reverse:        | TGCTTTCTCCGCTCTGAGC      |
| <i>angiogenin</i> | 191          | 60                        | Forward:        | TGTCCTGCCCGTTTCTGCGG     |
|                   |              |                           | Reverse:        | CCGGCCCTGTGGTTTGGCAT     |
| <i>MCP1</i>       | 231          | 60                        | Forward:        | TTCCCCAAGGGCTCGCTCAG     |
|                   |              |                           | Reverse:        | GGGTTTGCTTGTCAGGTGGTCC   |
| <i>uPAR</i>       | 139          | 60                        | Forward:        | CTGCCCTCGGACATGGGTC      |
|                   |              |                           | Reverse:        | TCCCAGGGCGCACTCTTCCA     |
| <i>BclXL</i>      | 102          | 60                        | Forward:        | AGCCTTGGATCCAGGAGAA      |
|                   |              |                           | Reverse:        | AGCGGTTGAAGCGTTCCT       |
| <i>survivin</i>   | 86           | 60                        | Forward:        | GCCCAGTGTTTCTTCTGCTT     |
|                   |              |                           | Reverse:        | CCGGACGAATGCTTTTTATG     |
